# Supplementary material
Source: PubMed Central journal article supplement (PMC3398815)
Supplement: NIHMS379656-supplement-1_si_001.pdf [file NIHMS379656-supplement-1_si_001.pdf]

SUPPORTING INFORMATION for  
Intrinsic energy landscapes of amino acid sidechains

*Xiao Zhu, Pedro E.M. Lopes, Jihyun Shim, Alexander D. MacKerell Jr.*

Department of Pharmaceutical Sciences, University of Maryland School of Pharmacy, 20 Penn Street  
HSFII, Baltimore, MD 21201

\*Corresponding author:

Alexander D. MacKerell Jr.

20 Penn Street,

Baltimore, MD 21201

Tel: 410-706-7442

Fax: 410-706-5017

Email: [alex@outerbanks.umaryland.edu](mailto:alex@outerbanks.umaryland.edu)

\* Additional data including QM energies and geometries are available for download at  
[http://mackerell.umaryland.edu/MacKerell\\_Lab.html](http://mackerell.umaryland.edu/MacKerell_Lab.html).

Table S1. PDB survey statistics.

| <b>Residue</b> | <b>ALL</b>     | <b>ALPHAR</b>  | <b>BETA</b>    | <b>ALPHAL</b> |
|----------------|----------------|----------------|----------------|---------------|
| ala            | 35,776         | 22,650         | 12,424         | 425           |
| arg            | 16,918         | 9,463          | 6,904          | 405           |
| asn            | 16,881         | 7,886          | 6,784          | 1,925         |
| asp            | 22,833         | 12,109         | 9,347          | 1,076         |
| cys            | 5,073          | 2,155          | 2,758          | 108           |
| gln            | 13,235         | 7,935          | 4,833          | 358           |
| glu            | 20,956         | 13,578         | 6,861          | 362           |
| gly            | 32,937         | 7,434          | 7,712          | 6,065         |
| his            | 9,368          | 4,443          | 4,432          | 368           |
| ile            | 22,286         | 9,699          | 12,490         | 18            |
| leu            | 36,182         | 20,651         | 15,016         | 275           |
| lys            | 17,451         | 10,111         | 6,699          | 482           |
| met            | 6,031          | 3,366          | 2,546          | 88            |
| phe            | 17,089         | 7,841          | 8,866          | 266           |
| pro            | 19,468         | 8,243          | 11,113         | 0             |
| ser            | 21,326         | 10,184         | 10,538         | 361           |
| thr            | 22,579         | 10,557         | 11,854         | 58            |
| trp            | 6,517          | 3,260          | 3,113          | 90            |
| tyr            | 14,984         | 6,793          | 7,814          | 262           |
| val            | 29,296         | 11,491         | 17,669         | 47            |
| <b>SUM</b>     | <b>387,186</b> | <b>189,849</b> | <b>169,773</b> | <b>13,039</b> |

Data extracted from a total of 2106 non-redundant PDB structures using selection criteria described in Methods.

Table S2. Rotamer populations calculated from 5 random and non-overlapping subsets of the crystallographic survey. Values in parenthesis represent the standard deviations.

| Residue | Chi1 |      |      |              |             |             |
|---------|------|------|------|--------------|-------------|-------------|
|         | Full |      |      | Average of 5 |             |             |
|         | t    | m    | p    | t            | m           | p           |
| arg     | 0.32 | 0.58 | 0.10 | 0.32 (0.01)  | 0.58 (0.01) | 0.10 (0.01) |
| asn     | 0.29 | 0.56 | 0.15 | 0.29 (0.01)  | 0.56 (0.01) | 0.15 (0.01) |
| asp     | 0.32 | 0.51 | 0.18 | 0.32 (0.00)  | 0.51 (0.01) | 0.18 (0.01) |
| cys     | 0.26 | 0.57 | 0.17 | 0.26 (0.02)  | 0.57 (0.01) | 0.17 (0.02) |
| gln     | 0.31 | 0.61 | 0.08 | 0.31 (0.01)  | 0.61 (0.01) | 0.08 (0.00) |
| glu     | 0.33 | 0.58 | 0.10 | 0.33 (0.01)  | 0.58 (0.01) | 0.10 (0.00) |
| his     | 0.33 | 0.54 | 0.13 | 0.33 (0.01)  | 0.54 (0.01) | 0.13 (0.01) |
| ile     | 0.09 | 0.77 | 0.14 | 0.09 (0.00)  | 0.77 (0.01) | 0.14 (0.01) |
| leu     | 0.31 | 0.67 | 0.01 | 0.31 (0.00)  | 0.67 (0.01) | 0.01 (0.00) |
| lys     | 0.34 | 0.59 | 0.07 | 0.34 (0.01)  | 0.59 (0.02) | 0.07 (0.00) |
| met     | 0.28 | 0.64 | 0.08 | 0.28 (0.01)  | 0.64 (0.01) | 0.08 (0.00) |
| phe     | 0.34 | 0.54 | 0.11 | 0.34 (0.01)  | 0.54 (0.01) | 0.11 (0.01) |
| ser     | 0.23 | 0.28 | 0.49 | 0.23 (0.01)  | 0.28 (0.01) | 0.49 (0.01) |
| thr     | 0.07 | 0.43 | 0.49 | 0.07 (0.00)  | 0.43 (0.01) | 0.49 (0.01) |
| trp     | 0.34 | 0.50 | 0.16 | 0.34 (0.01)  | 0.50 (0.02) | 0.16 (0.01) |
| tyr     | 0.34 | 0.54 | 0.12 | 0.34 (0.01)  | 0.54 (0.01) | 0.12 (0.00) |
| val     | 0.74 | 0.19 | 0.07 | 0.74 (0.01)  | 0.19 (0.01) | 0.07 (0.01) |

  

| Residue | Chi2 |      |      |             |             |             |
|---------|------|------|------|-------------|-------------|-------------|
|         | t    | m    | p    | t           | m           | p           |
| arg     | 0.78 | 0.13 | 0.08 | 0.78 (0.00) | 0.13 (0.01) | 0.08 (0.00) |
| asn*    | 0.52 | 0.05 | 0.17 | 0.52 (0.01) | 0.05 (0.00) | 0.17 (0.01) |
| asp     | 0.82 |      | 0.18 | 0.82 (0.00) |             | 0.18 (0.00) |
| gln     | 0.61 | 0.22 | 0.16 | 0.61 (0.01) | 0.22 (0.01) | 0.16 (0.01) |
| glu     | 0.63 | 0.20 | 0.17 | 0.63 (0.01) | 0.20 (0.00) | 0.17 (0.01) |
| his     | 0.08 | 0.39 | 0.53 | 0.08 (0.01) | 0.39 (0.01) | 0.53 (0.00) |
| ile     | 0.79 | 0.16 | 0.05 | 0.79 (0.01) | 0.16 (0.01) | 0.05 (0.00) |
| leu     | 0.66 | 0.01 | 0.33 | 0.66 (0.01) | 0.01 (0.00) | 0.33 (0.00) |
| lys     | 0.78 | 0.15 | 0.07 | 0.78 (0.00) | 0.15 (0.00) | 0.07 (0.00) |
| met     | 0.56 | 0.32 | 0.11 | 0.56 (0.01) | 0.33 (0.01) | 0.11 (0.01) |
| phe     | 0.14 |      | 0.86 | 0.14 (0.00) |             | 0.86 (0.00) |
| trp*    | 0.01 | 0.17 | 0.31 | 0.01 (0.00) | 0.17 (0.01) | 0.31 (0.01) |
| tyr     | 0.12 |      | 0.88 | 0.12 (0.01) |             | 0.88 (0.01) |

\* for Asn and Trp Chi2, which involves a  $sp^2$  atom center, the **t** rotamer column includes data for the 'cis' conformation where Chi2=0 (right). Definitions of rotamers are indicated in Methods section of the main text.

Table S3. Sum of normalized Boltzmann factors calculated from QM data offset to global minimum around each rotameric  $\chi_1, \chi_2$  conformations.

| QM      |       | % of all residues of same type |       |       |       |       |       |       |       |      |       |       |       |
|---------|-------|--------------------------------|-------|-------|-------|-------|-------|-------|-------|------|-------|-------|-------|
| phi300  |       |                                |       |       |       |       |       |       |       |      |       |       |       |
| Residue | tt    | tc                             | tm    | tp    | mt    | mc    | mm    | mp    | pt    | pc   | pm    | pp    | sum   |
| arg     | 0.00  |                                | 22.04 | 6.74  | 0.00  |       | 0.06  | 0.00  | 0.00  |      | 0.00  | 0.00  | 28.85 |
| asn     | 0.00  | 0.50                           | 0.03  | 0.00  | 1.04  | 0.01  | 6.76  | 0.01  | 5.54  | 0.00 | 0.01  | 6.86  | 20.75 |
| asp     | 0.00  |                                | 0.00  |       | 0.00  |       | 0.00  |       | 29.79 |      | 0.64  |       | 30.43 |
| gln     | 0.33  |                                | 1.45  | 0.20  | 0.58  |       | 20.50 | 0.45  | 0.26  |      | 0.36  | 5.65  | 29.77 |
| glu     | 0.00  |                                | 0.00  | 0.00  | 0.00  |       | 0.00  | 5.04  | 0.00  |      | 24.36 | 0.14  | 29.55 |
| hsd     | 19.52 |                                | 0.03  | 0.19  | 1.84  |       | 0.18  | 3.94  | 1.07  |      | 15.74 | 0.04  | 42.55 |
| hse     | 0.00  |                                | 0.01  | 0.00  | 1.29  |       | 8.37  | 0.01  | 6.96  |      | 0.01  | 4.33  | 20.98 |
| hsp     | 31.72 |                                | 0.00  | 0.00  | 0.00  |       | 0.00  | 0.00  | 0.00  |      | 0.00  | 0.00  | 31.72 |
| ile     | 5.21  |                                | 0.36  | 12.65 | 9.52  |       | 9.45  | 1.84  | 2.03  |      | 0.20  | 0.14  | 41.40 |
| leu     | 1.48  |                                | 0.62  | 18.39 | 6.45  |       | 0.51  | 0.99  | 0.27  |      | 0.00  | 0.08  | 28.79 |
| lys     | 0.00  |                                | 1.26  | 31.56 | 0.00  |       | 0.01  | 0.00  | 0.00  |      | 0.00  | 0.00  | 32.83 |
| met     | 3.85  |                                | 0.04  | 1.14  | 1.07  |       | 0.06  | 30.87 | 0.21  |      | 0.00  | 0.02  | 37.27 |
| phe     | 0.05  |                                | 0.73  |       | 4.28  |       | 26.99 |       | 0.00  |      | 7.72  |       | 39.76 |
| trp     | 0.00  | 0.13                           | 0.10  | 0.14  | 1.00  | 0.67  | 14.44 | 6.28  | 0.00  | 0.00 | 7.21  | 10.26 | 40.24 |
| tyr     | 0.06  |                                | 0.84  |       | 4.78  |       | 27.15 |       | 0.01  |      | 10.07 |       | 42.89 |
| phi-120 |       |                                |       |       |       |       |       |       |       |      |       |       |       |
| Residue | tt    | tc                             | tm    | tp    | mt    | mc    | mm    | mp    | pt    | pc   | pm    | pp    | sum   |
| arg     | 0.00  |                                | 0.00  | 0.00  | 0.01  |       | 12.01 | 38.50 | 0.00  |      | 0.00  | 0.02  | 50.54 |
| asn     | 12.12 | 0.03                           | 7.73  | 0.35  | 0.05  | 15.45 | 0.49  | 0.26  | 0.59  | 4.78 | 0.00  | 7.08  | 48.94 |
| asp     | 34.59 |                                | 0.67  |       | 0.08  |       | 1.32  |       | 0.54  |      | 0.03  |       | 37.23 |
| gln     | 1.22  |                                | 14.00 | 16.27 | 0.89  |       | 0.27  | 8.78  | 0.07  |      | 0.08  | 4.01  | 45.58 |
| glu     | 0.00  |                                | 0.09  | 7.83  | 0.00  |       | 0.29  | 34.82 | 0.00  |      | 0.18  | 0.00  | 43.20 |
| hsd     | 0.91  |                                | 0.25  | 6.09  | 6.13  |       | 0.03  | 0.05  | 7.15  |      | 11.65 | 0.00  | 32.27 |
| hse     | 11.87 |                                | 9.83  | 0.58  | 0.25  |       | 2.68  | 1.31  | 1.85  |      | 0.01  | 1.06  | 29.45 |
| hsp     | 0.00  |                                | 0.00  | 0.00  | 38.41 |       | 0.00  | 0.00  | 4.80  |      | 0.87  | 0.00  | 44.08 |
| ile     | 1.05  |                                | 0.09  | 1.16  | 10.77 |       | 13.22 | 1.54  | 0.70  |      | 0.07  | 0.04  | 28.63 |
| leu     | 1.46  |                                | 0.65  | 10.32 | 18.29 |       | 1.07  | 1.22  | 0.11  |      | 0.00  | 0.03  | 33.15 |
| lys     | 0.00  |                                | 0.00  | 0.00  | 0.00  |       | 36.29 | 2.56  | 0.00  |      | 0.01  | 0.02  | 38.89 |
| met     | 0.86  |                                | 0.00  | 23.05 | 0.59  |       | 0.11  | 0.17  | 0.10  |      | 0.00  | 0.01  | 24.90 |
| phe     | 0.08  |                                | 24.93 |       | 0.80  |       | 2.12  |       | 0.00  |      | 0.19  |       | 28.13 |
| trp     | 0.03  | 0.02                           | 15.68 | 10.11 | 0.03  | 0.48  | 0.79  | 0.21  | 0.00  | 0.00 | 0.01  | 0.28  | 27.64 |
| tyr     | 0.07  |                                | 23.60 |       | 0.68  |       | 1.76  |       | 0.00  |      | 0.23  |       | 26.33 |
| phi63   |       |                                |       |       |       |       |       |       |       |      |       |       |       |
| Residue | tt    | tc                             | tm    | tp    | mt    | mc    | mm    | mp    | pt    | pc   | pm    | pp    | sum   |
| arg     | 0.00  |                                | 0.18  | 0.00  | 0.00  |       | 0.00  | 0.00  | 0.02  |      | 0.05  | 20.35 | 20.61 |
| asn     | 0.15  | 0.17                           | 1.88  | 0.00  | 21.24 | 0.00  | 2.00  | 1.74  | 0.01  | 0.00 | 0.00  | 3.11  | 30.31 |
| asp     | 0.00  |                                | 0.00  |       | 29.26 |       | 3.08  |       | 0.00  |      | 0.00  |       | 32.34 |
| gln     | 0.08  |                                | 0.27  | 0.01  | 1.81  |       | 19.21 | 2.94  | 0.00  |      | 0.01  | 0.31  | 24.65 |
| glu     | 0.00  |                                | 0.00  | 0.00  | 0.00  |       | 1.55  | 24.85 | 0.00  |      | 0.85  | 0.00  | 27.25 |
| hsd     | 5.95  |                                | 0.00  | 5.73  | 0.03  |       | 2.38  | 0.26  | 0.24  |      | 10.59 | 0.00  | 25.18 |
| hse     | 0.02  |                                | 0.11  | 0.00  | 36.82 |       | 9.45  | 1.77  | 0.06  |      | 0.00  | 1.34  | 49.57 |
| hsp     | 0.94  |                                | 0.00  | 0.12  | 0.00  |       | 0.00  | 0.00  | 4.00  |      | 19.13 | 0.01  | 24.20 |
| ile     | 0.26  |                                | 0.01  | 0.32  | 15.48 |       | 7.60  | 0.52  | 5.27  |      | 0.07  | 0.45  | 29.97 |
| leu     | 0.23  |                                | 0.09  | 4.24  | 27.98 |       | 1.70  | 3.71  | 0.06  |      | 0.00  | 0.05  | 38.06 |
| lys     | 0.01  |                                | 0.16  | 0.00  | 0.00  |       | 0.00  | 0.00  | 0.02  |      | 0.00  | 28.09 | 28.28 |
| met     | 0.77  |                                | 0.00  | 3.55  | 0.86  |       | 0.02  | 32.60 | 0.03  |      | 0.00  | 0.00  | 37.83 |
| phe     | 0.01  |                                | 0.06  |       | 1.09  |       | 30.79 |       | 0.00  |      | 0.17  |       | 32.11 |
| trp     | 0.00  | 0.00                           | 0.05  | 0.00  | 1.23  | 0.09  | 15.54 | 13.12 | 0.00  | 0.00 | 0.01  | 2.07  | 32.12 |
| tyr     | 0.00  |                                | 0.04  |       | 1.19  |       | 29.25 |       | 0.00  |      | 0.29  |       | 30.78 |

Calculated by summing probabilities within a window side of  $\pm 60^\circ$  around exact rotamer definitions. For Asp, Asn, Phe, Trp, and Tyr, window size of  $\pm 45^\circ$  was used around  $sp^3-sp^2$  rotamer definitions as described in Methods section of the main text.

Table S4. Sum of survey probabilities around rotameric  $\chi_1, \chi_2$  conformations.

| XTAL    |       | % of all residues of same type |       |       |       |      |       |       |      |      |      |      |       |
|---------|-------|--------------------------------|-------|-------|-------|------|-------|-------|------|------|------|------|-------|
| _alphaR |       |                                |       |       |       |      |       |       |      |      |      |      |       |
| Residue | tt    | tc                             | tm    | tp    | mt    | mc   | mm    | mp    | pt   | pc   | pm   | pp   | sum   |
| arg     | 18.72 |                                | 0.72  | 5.56  | 28.84 |      | 5.00  | 0.42  | 2.07 |      | 0.02 | 0.57 | 61.91 |
| asn     | 0.86  | 0.19                           | 4.93  | 2.71  | 27.66 | 1.75 | 1.45  | 8.41  | 1.05 | 0.07 | 0.13 | 0.26 | 49.46 |
| asp     | 1.78  |                                | 8.04  |       | 45.32 |      | 1.74  |       | 2.77 |      | 0.29 |      | 59.94 |
| gln     | 11.65 |                                | 1.23  | 11.14 | 27.40 |      | 11.25 | 2.05  | 1.10 |      | 0.33 | 0.65 | 66.81 |
| glu     | 16.48 |                                | 1.34  | 8.01  | 26.24 |      | 10.95 | 5.13  | 1.14 |      | 0.75 | 0.80 | 70.85 |
| his     | 0.45  |                                | 14.05 | 7.50  | 3.06  |      | 9.35  | 14.57 | 0.30 |      | 0.71 | 1.48 | 51.46 |
| ile     | 1.28  |                                | 0.03  | 2.04  | 32.96 |      | 6.46  | 0.23  | 2.54 |      | 0.00 | 0.14 | 45.68 |
| leu     | 1.19  |                                | 0.23  | 19.03 | 39.18 |      | 0.37  | 1.19  | 0.01 |      | 0.00 | 0.22 | 61.41 |
| lys     | 21.47 |                                | 0.46  | 5.30  | 27.88 |      | 6.17  | 0.27  | 1.75 |      | 0.00 | 0.10 | 63.38 |
| met     | 8.12  |                                | 2.98  | 6.60  | 22.88 |      | 18.24 | 1.61  | 1.17 |      | 0.05 | 0.12 | 61.75 |
| phe     | 0.63  |                                | 26.42 | 0.00  | 7.52  |      | 12.90 | 0.00  | 0.04 |      | 0.82 | 0.00 | 48.34 |
| trp     | 0.02  | 1.98                           | 11.67 | 14.29 | 0.54  | 6.78 | 0.73  | 12.14 | 0.00 | 0.17 | 2.62 | 0.45 | 51.40 |
| tyr     | 0.43  |                                | 25.39 |       | 7.35  |      | 12.81 |       | 0.03 |      | 1.33 |      | 47.34 |
| _beta   |       |                                |       |       |       |      |       |       |      |      |      |      |       |
| Residue | tt    | tc                             | tm    | tp    | mt    | mc   | mm    | mp    | pt   | pc   | pm   | pp   | sum   |
| arg     | 10.78 |                                | 0.44  | 1.37  | 12.03 |      | 4.64  | 0.64  | 3.68 |      | 0.26 | 0.33 | 34.16 |
| asn     | 6.32  | 0.49                           | 2.41  | 2.99  | 4.77  | 1.04 | 1.73  | 6.58  | 1.30 | 0.06 | 1.25 | 0.74 | 29.68 |
| asp     | 11.92 |                                | 3.37  |       | 9.56  |      | 2.13  |       | 1.98 |      | 1.04 |      | 30.00 |
| gln     | 9.31  |                                | 0.55  | 2.65  | 8.63  |      | 3.80  | 0.66  | 2.88 |      | 0.29 | 0.30 | 29.07 |
| glu     | 9.77  |                                | 0.38  | 1.28  | 9.03  |      | 2.46  | 0.45  | 2.62 |      | 0.07 | 0.33 | 26.39 |
| his     | 0.87  |                                | 6.66  | 7.46  | 1.32  |      | 5.62  | 13.29 | 0.04 |      | 3.12 | 3.23 | 41.61 |
| ile     | 4.16  |                                | 0.02  | 0.56  | 32.21 |      | 9.23  | 1.26  | 6.27 |      | 0.05 | 0.31 | 54.07 |
| leu     | 1.35  |                                | 0.23  | 14.42 | 18.17 |      | 0.24  | 1.90  | 0.40 |      | 0.01 | 0.66 | 37.38 |
| lys     | 11.07 |                                | 0.18  | 1.72  | 11.30 |      | 4.30  | 0.39  | 3.15 |      | 0.06 | 0.02 | 32.18 |
| met     | 9.63  |                                | 1.73  | 2.49  | 9.79  |      | 7.23  | 0.84  | 3.40 |      | 0.75 | 0.35 | 36.22 |
| phe     | 0.63  |                                | 11.12 | 0.00  | 2.79  |      | 24.82 | 0.00  | 0.07 |      | 9.82 | 0.00 | 49.26 |
| trp     | 0.00  | 2.69                           | 4.68  | 3.02  | 0.05  | 3.50 | 3.64  | 20.39 | 0.00 | 0.31 | 5.01 | 3.33 | 46.61 |
| tyr     | 0.69  |                                | 11.35 |       | 2.43  |      | 25.91 |       | 0.07 |      | 9.51 |      | 49.96 |
| _alphaL |       |                                |       |       |       |      |       |       |      |      |      |      |       |
| Residue | tt    | tc                             | tm    | tp    | mt    | mc   | mm    | mp    | pt   | pc   | pm   | pp   | sum   |
| arg     | 0.16  |                                | 0.01  | 0.08  | 2.51  |      | 0.81  | 0.22  | 0.06 |      | 0.00 | 0.06 | 3.92  |
| asn     | 2.87  | 0.25                           | 3.34  | 0.18  | 6.16  | 1.23 | 1.37  | 5.25  | 0.05 | 0.10 | 0.02 | 0.03 | 20.86 |
| asp     | 2.00  |                                | 1.37  |       | 5.90  |      | 0.60  |       | 0.15 |      | 0.03 |      | 10.06 |
| gln     | 0.09  |                                | 0.00  | 0.06  | 2.26  |      | 1.40  | 0.27  | 0.02 |      | 0.01 | 0.01 | 4.12  |
| glu     | 0.09  |                                | 0.01  | 0.06  | 1.83  |      | 0.62  | 0.07  | 0.01 |      | 0.02 | 0.05 | 2.76  |
| his     | 0.11  |                                | 0.22  | 0.24  | 0.97  |      | 1.61  | 3.49  | 0.04 |      | 0.15 | 0.11 | 6.94  |
| ile     | 0.00  |                                | 0.00  | 0.00  | 0.17  |      | 0.04  | 0.01  | 0.04 |      | 0.00 | 0.00 | 0.26  |
| leu     | 0.01  |                                | 0.00  | 0.11  | 1.03  |      | 0.01  | 0.03  | 0.00 |      | 0.00 | 0.00 | 1.20  |
| lys     | 0.11  |                                | 0.00  | 0.03  | 2.90  |      | 1.25  | 0.13  | 0.01 |      | 0.00 | 0.00 | 4.43  |
| met     | 0.05  |                                | 0.02  | 0.09  | 0.72  |      | 1.07  | 0.02  | 0.02 |      | 0.00 | 0.02 | 2.03  |
| phe     | 0.02  |                                | 0.16  | 0.00  | 0.51  |      | 1.71  | 0.00  | 0.00 |      | 0.01 | 0.00 | 2.40  |
| trp     | 0.00  | 0.02                           | 0.17  | 0.02  | 0.00  | 0.45 | 0.33  | 0.99  | 0.00 | 0.00 | 0.00 | 0.00 | 1.98  |
| tyr     | 0.01  |                                | 0.21  |       | 0.55  |      | 1.89  |       | 0.01 |      | 0.03 |      | 2.71  |

Calculated by summing probabilities within a window side of  $\pm 60^\circ$  around exact rotamer definitions. For Asp, Asn, Phe, Trp, and Tyr, window size of  $\pm 45^\circ$  was used around  $sp^3-sp^2$  rotamer definitions as described in Methods section of the main text.

Table S5. Secondary structure propensity scale derived from intrinsic energetics.

| <b>Residue</b> | <b>alphaR</b> | <b>beta</b> | <b>alphaL</b> |
|----------------|---------------|-------------|---------------|
| arg            | -2.95         | -0.60       | -0.13         |
| asn            | -0.90         | -0.51       | -0.25         |
| cys            | -1.42         | -0.07       | -0.93         |
| gln            | -2.14         | -0.04       | -1.06         |
| hsd            | -2.28         | -0.05       | -1.00         |
| hse            | -0.20         | -0.69       | -0.80         |
| ile            | -2.21         | 0.00        | -3.19         |
| leu            | -1.72         | -0.01       | -2.01         |
| lys            | -2.62         | -0.85       | -0.07         |
| met            | -2.01         | -0.02       | -1.46         |
| phe            | -1.82         | -0.04       | -1.10         |
| ser            | -1.57         | -0.05       | -1.13         |
| thr            | -1.89         | -0.01       | -2.77         |
| trp            | -1.70         | -0.04       | -1.20         |
| tyr            | -1.78         | -0.04       | -1.16         |
| val            | -2.17         | 0.00        | -2.91         |

Lowest value reflects least likelihood.

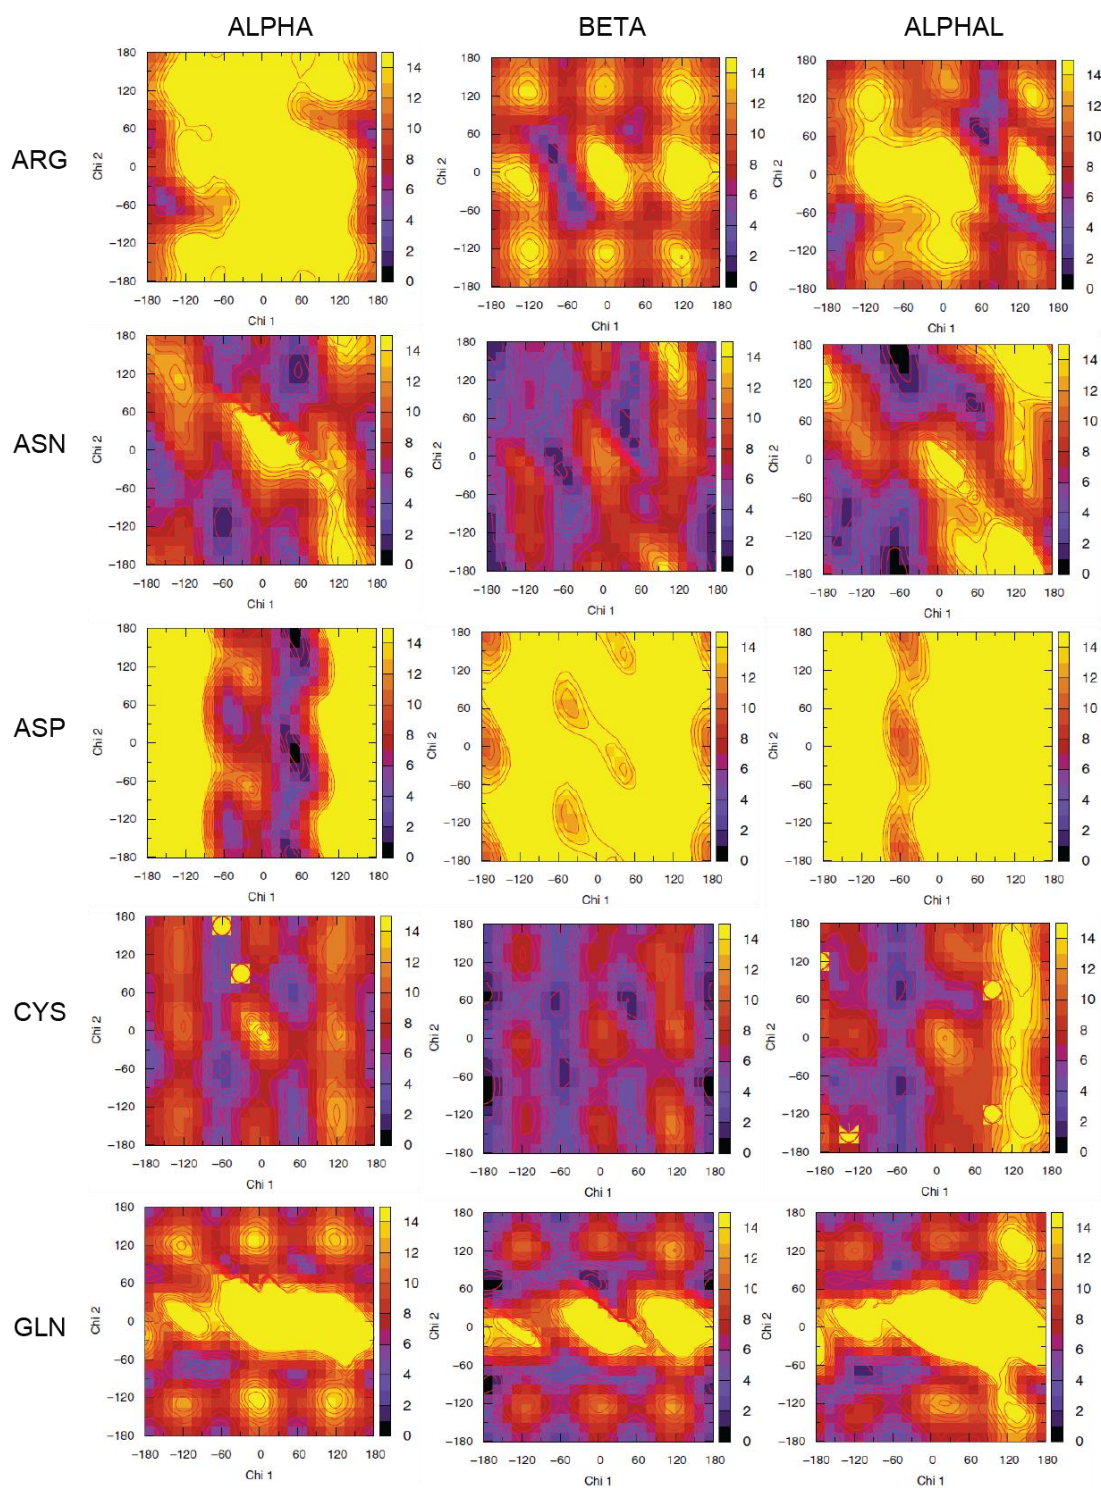

Figure S1. QM energy surfaces for the rotation of  $\chi_1$  and  $\chi_2$  dihedrals. For Phe/Tyr/Asp, a continuous 360° scan of the side chains is included, although they are symmetric, to show the extent of error in QM calculations. ALPHA = ALPHAR.

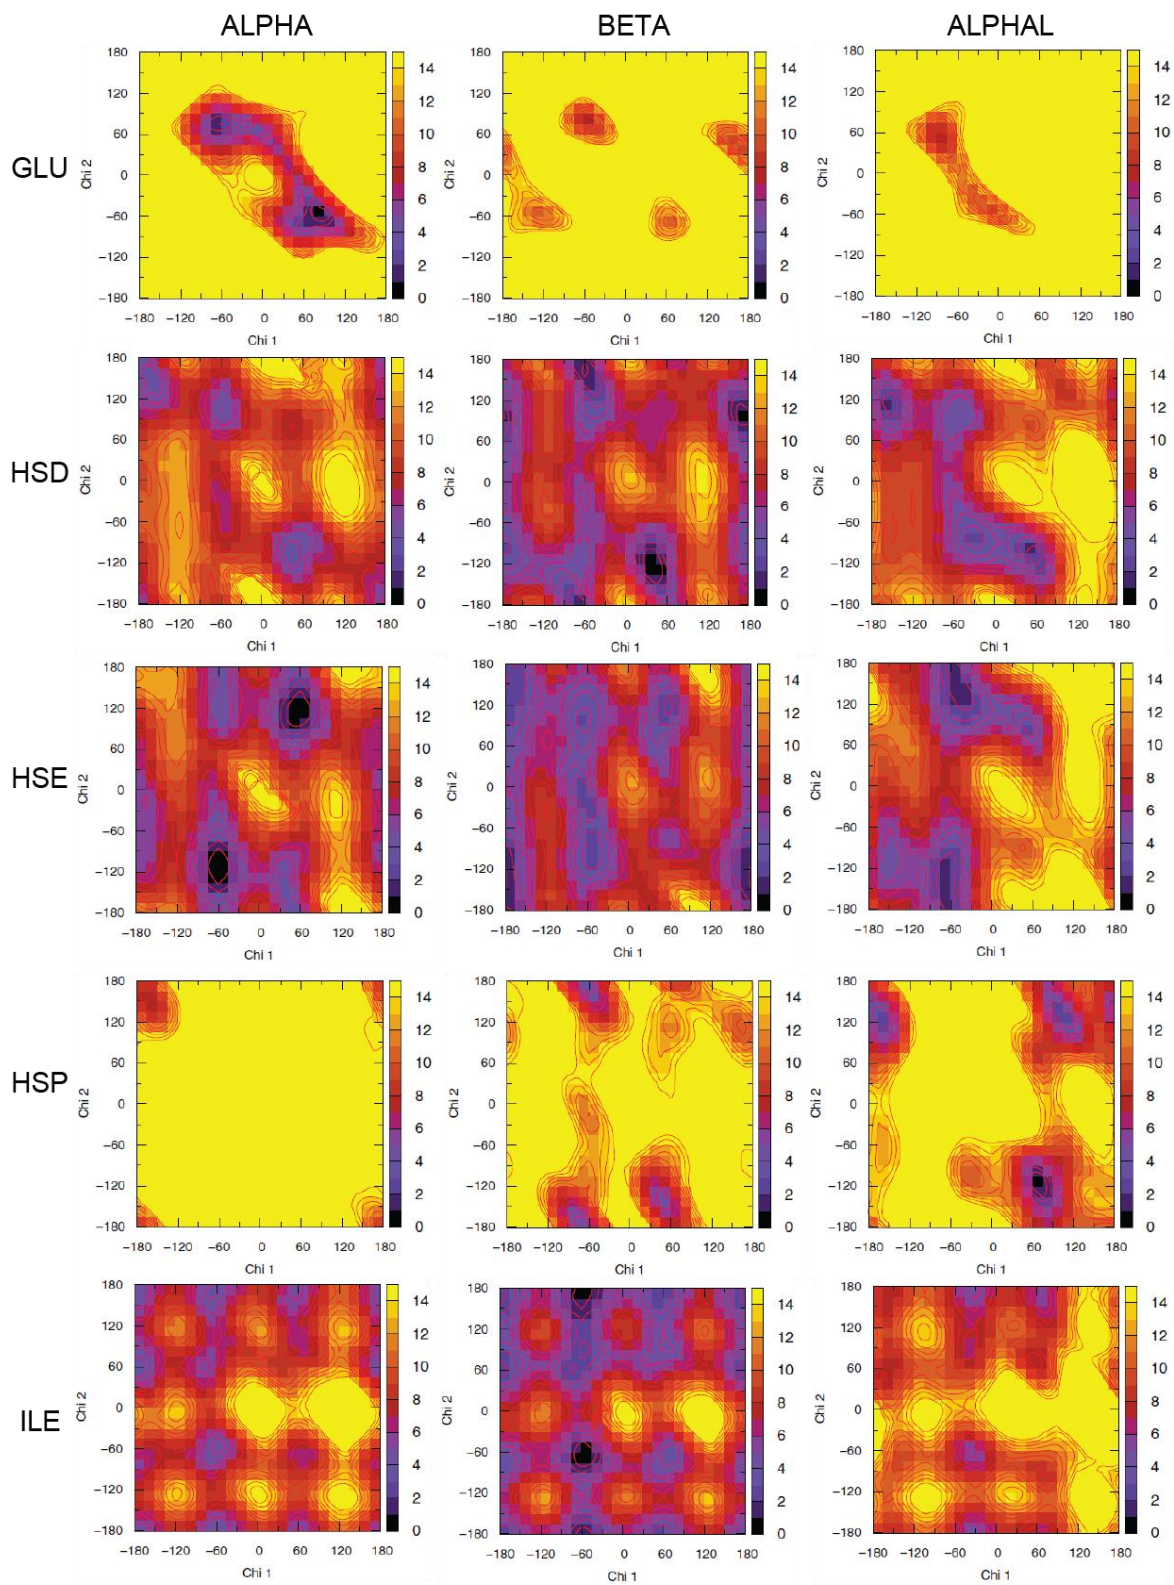

Figure S1 cont'd



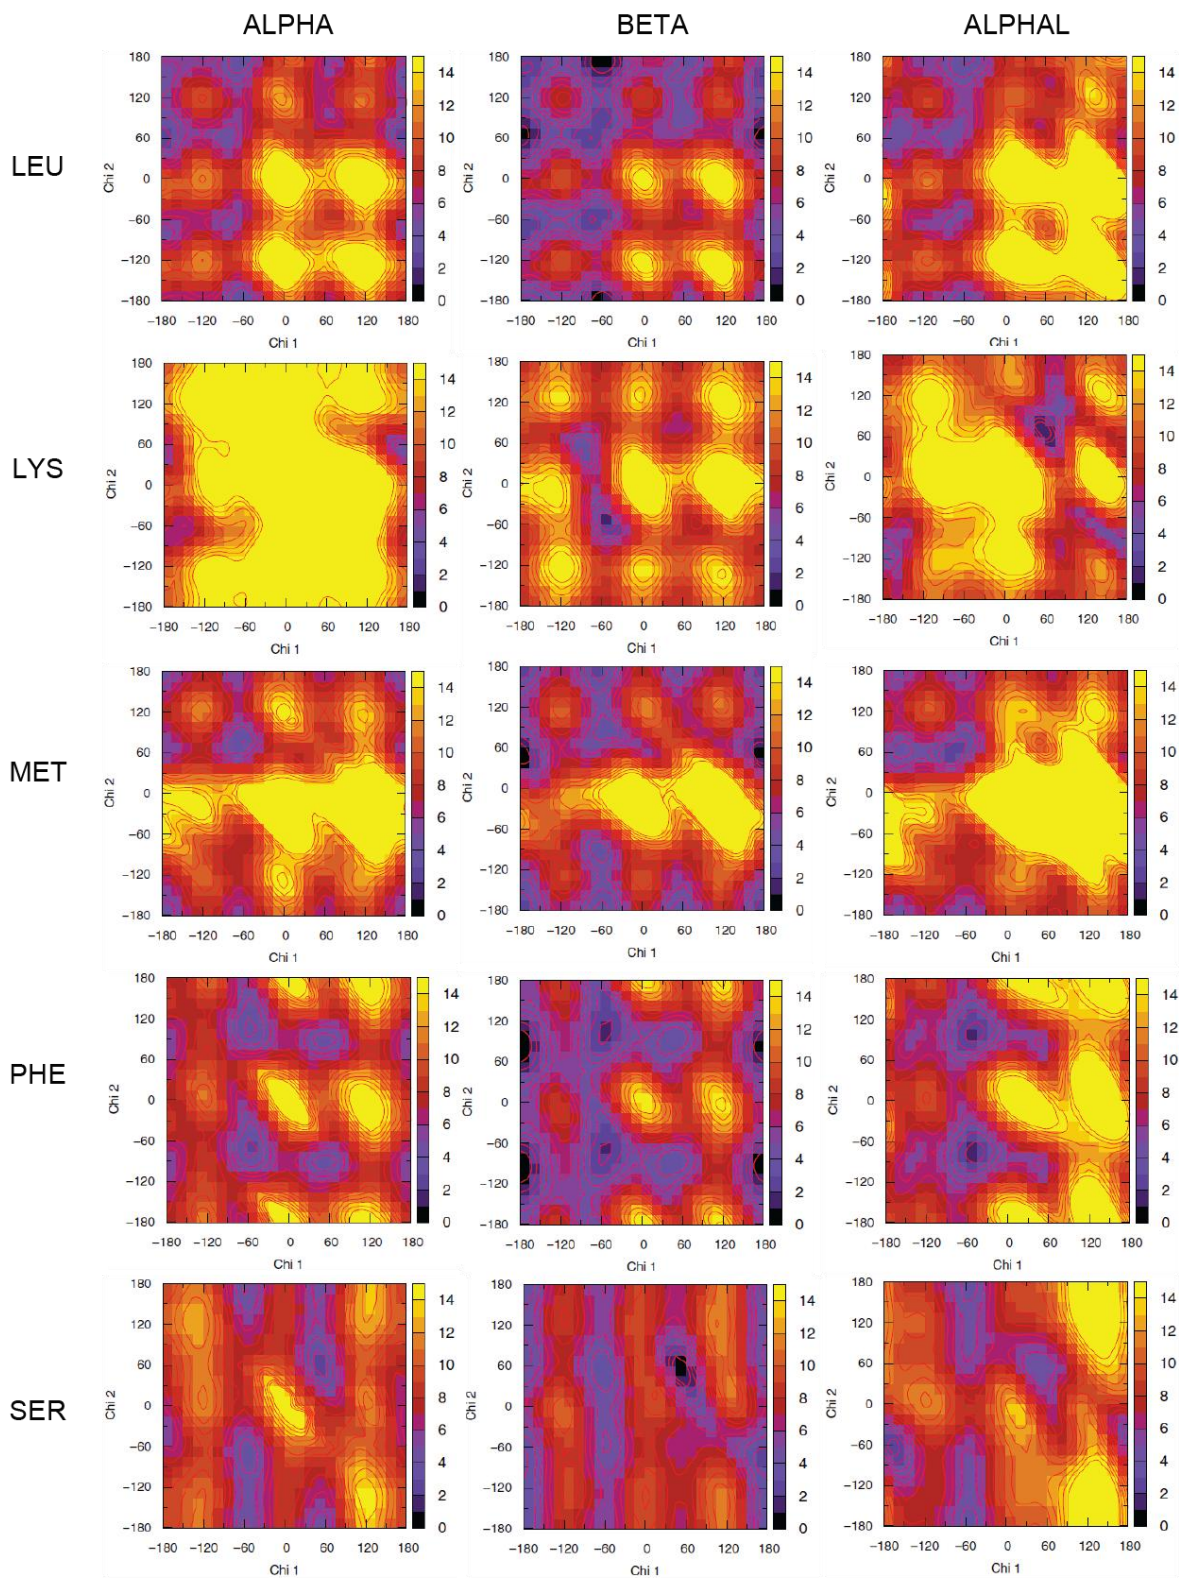

Figure S1 cont'd

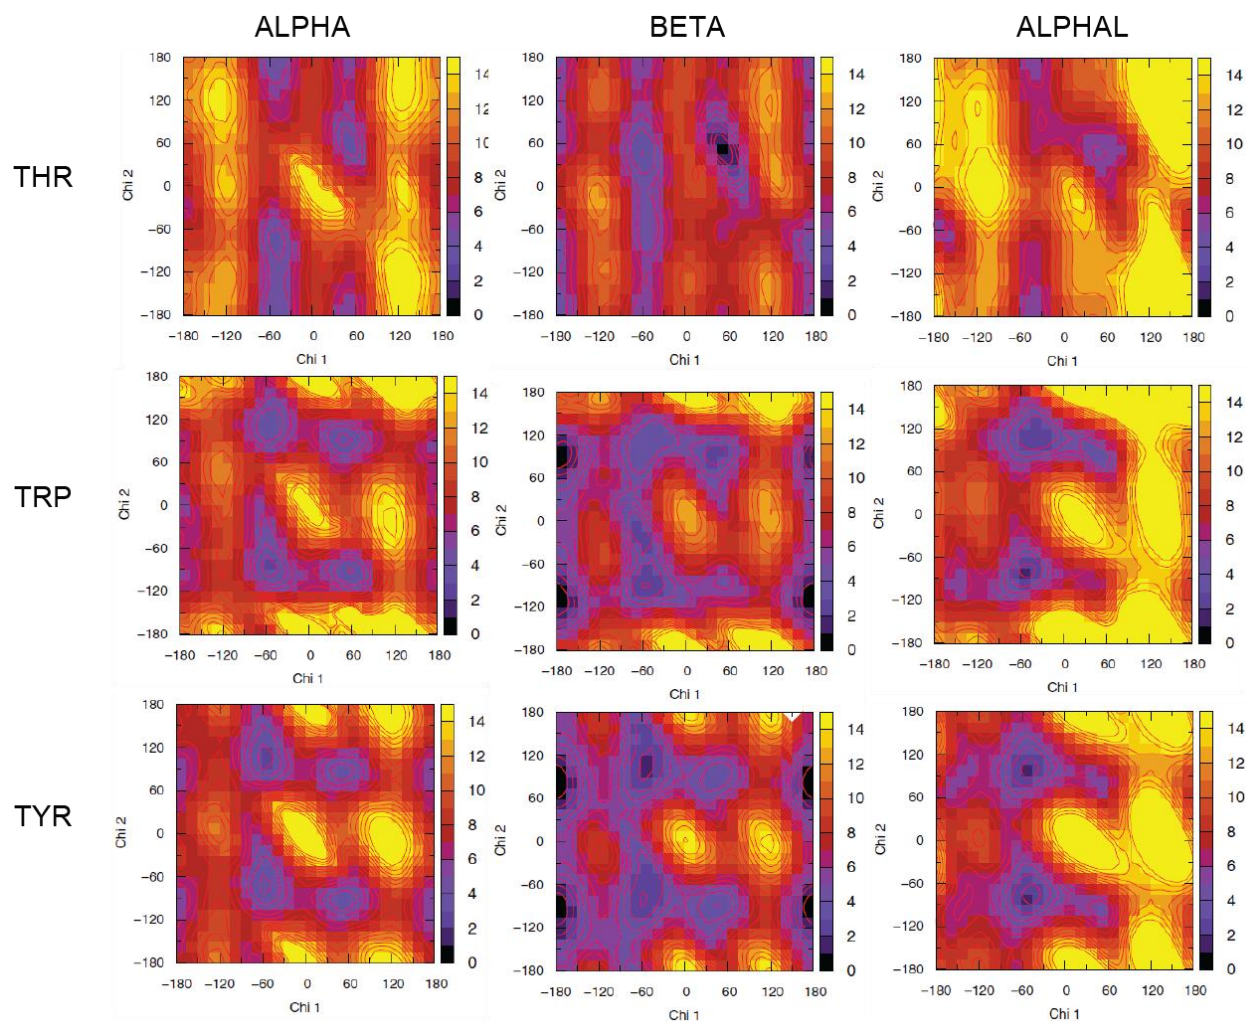

Figure S1 cont'd

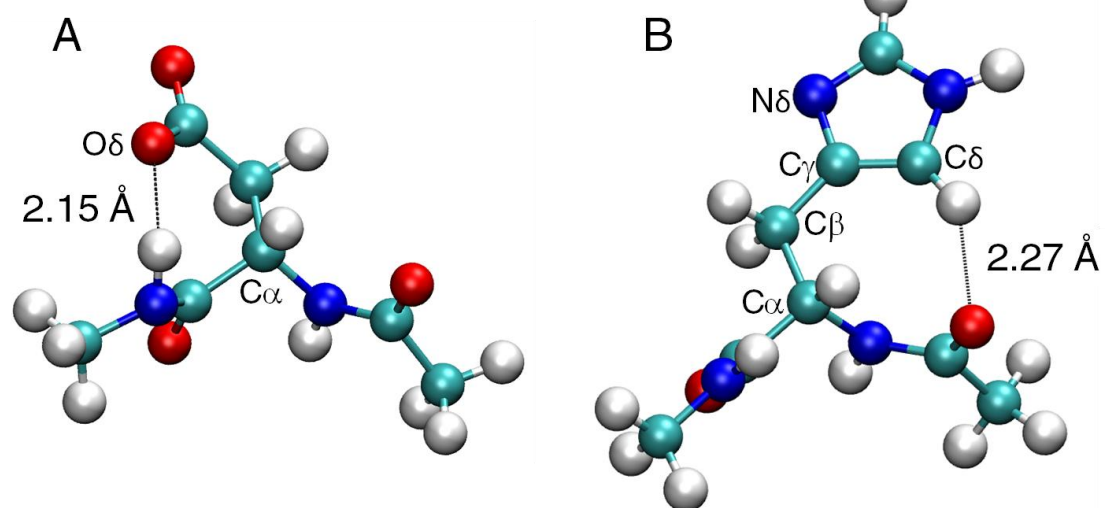

Figure S2. A) Asp and B) Hse dipeptides with Beta backbone and at  $(\chi_1, \chi_2) = (-180^\circ, 0^\circ)$  and  $(m, 0^\circ)$  conformations, respectively, showing close interactions with the backbone.

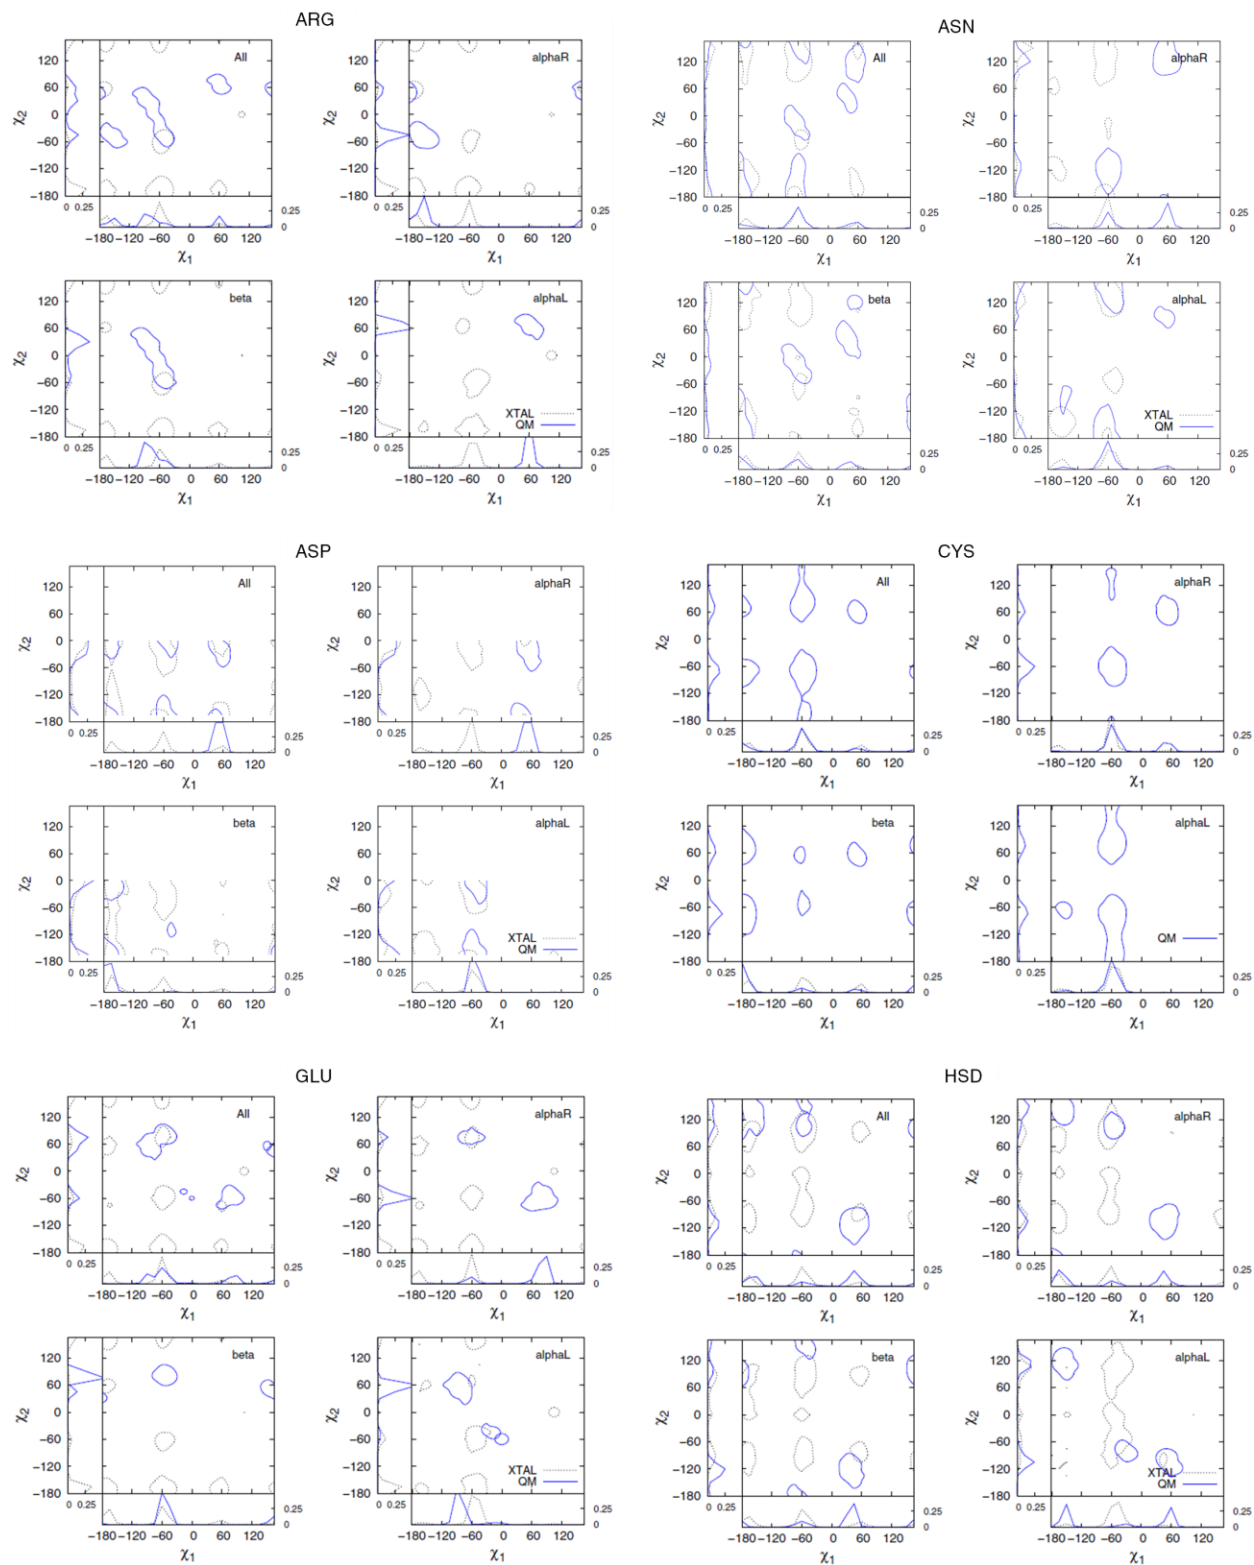

Figure S3. Combined QM (solid) and PDB survey (dashed) probability distributions with a contour level of 0.005. Backbone-dependent data are derived from individually pooled backbone conformations and are not normalized to global population.

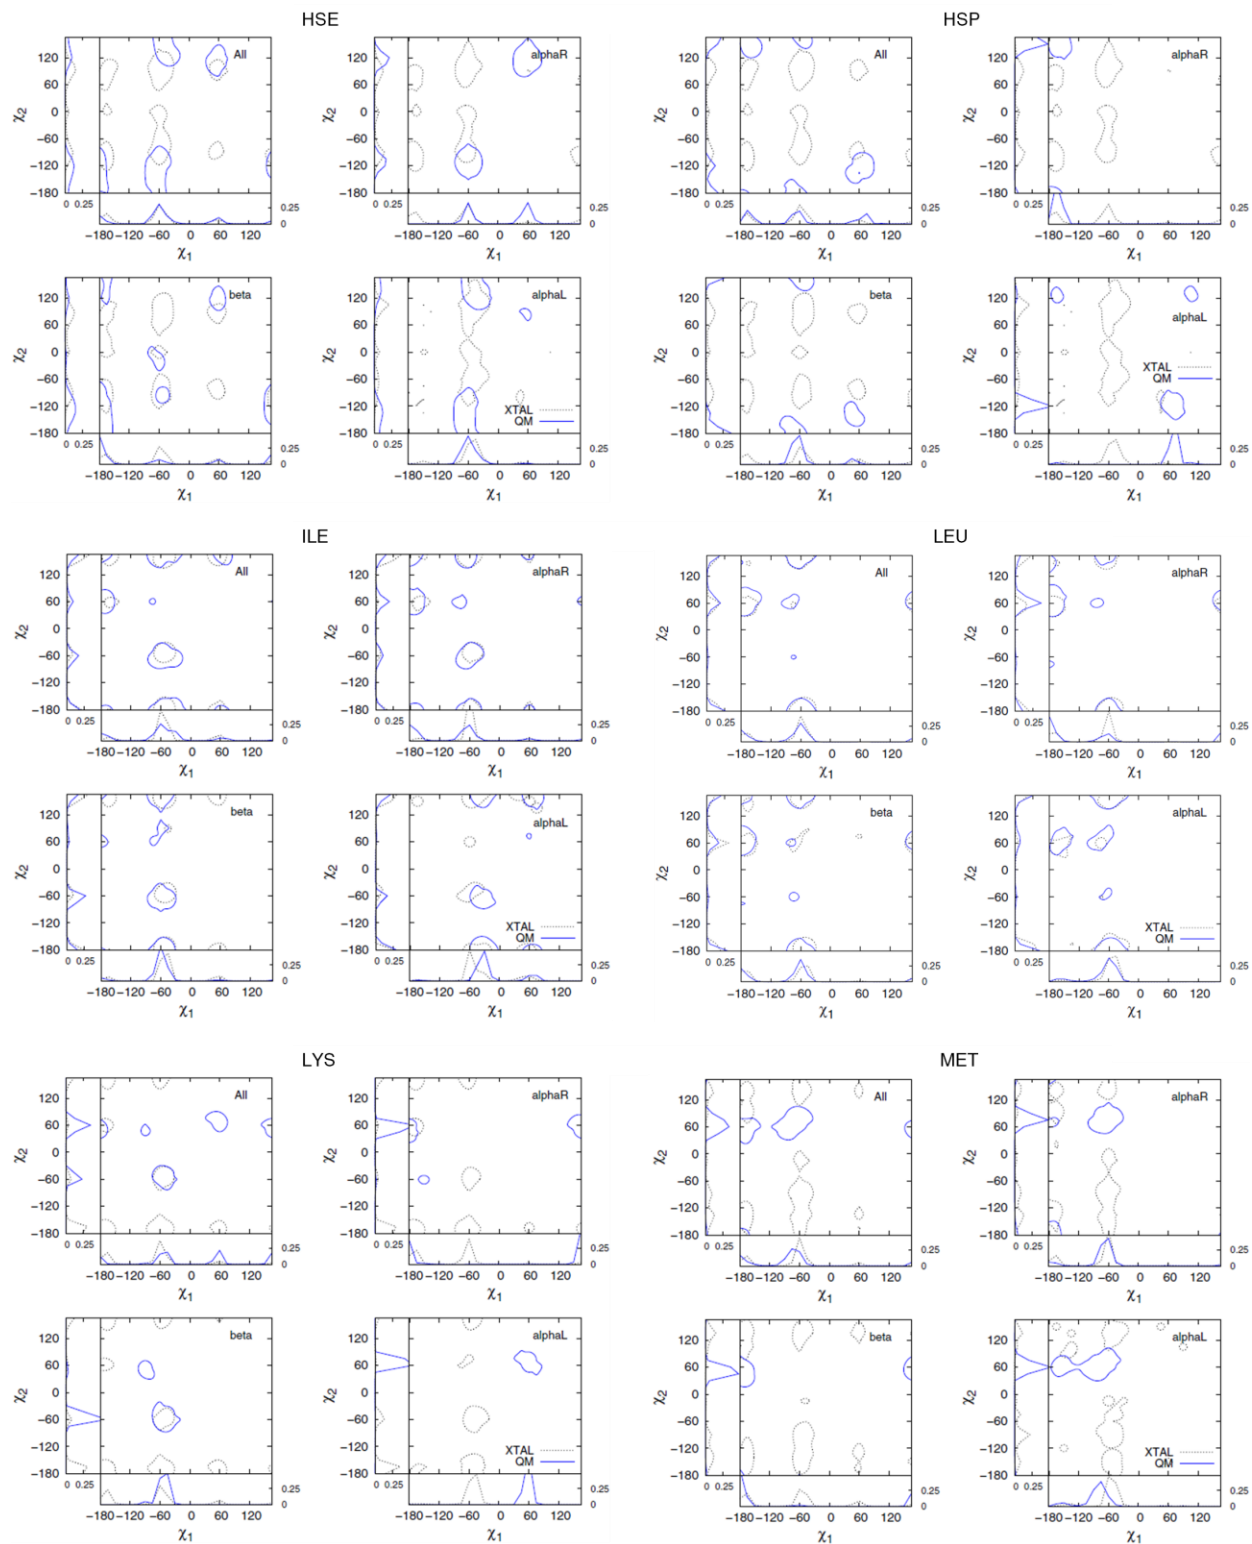

Figure S3 cont'd

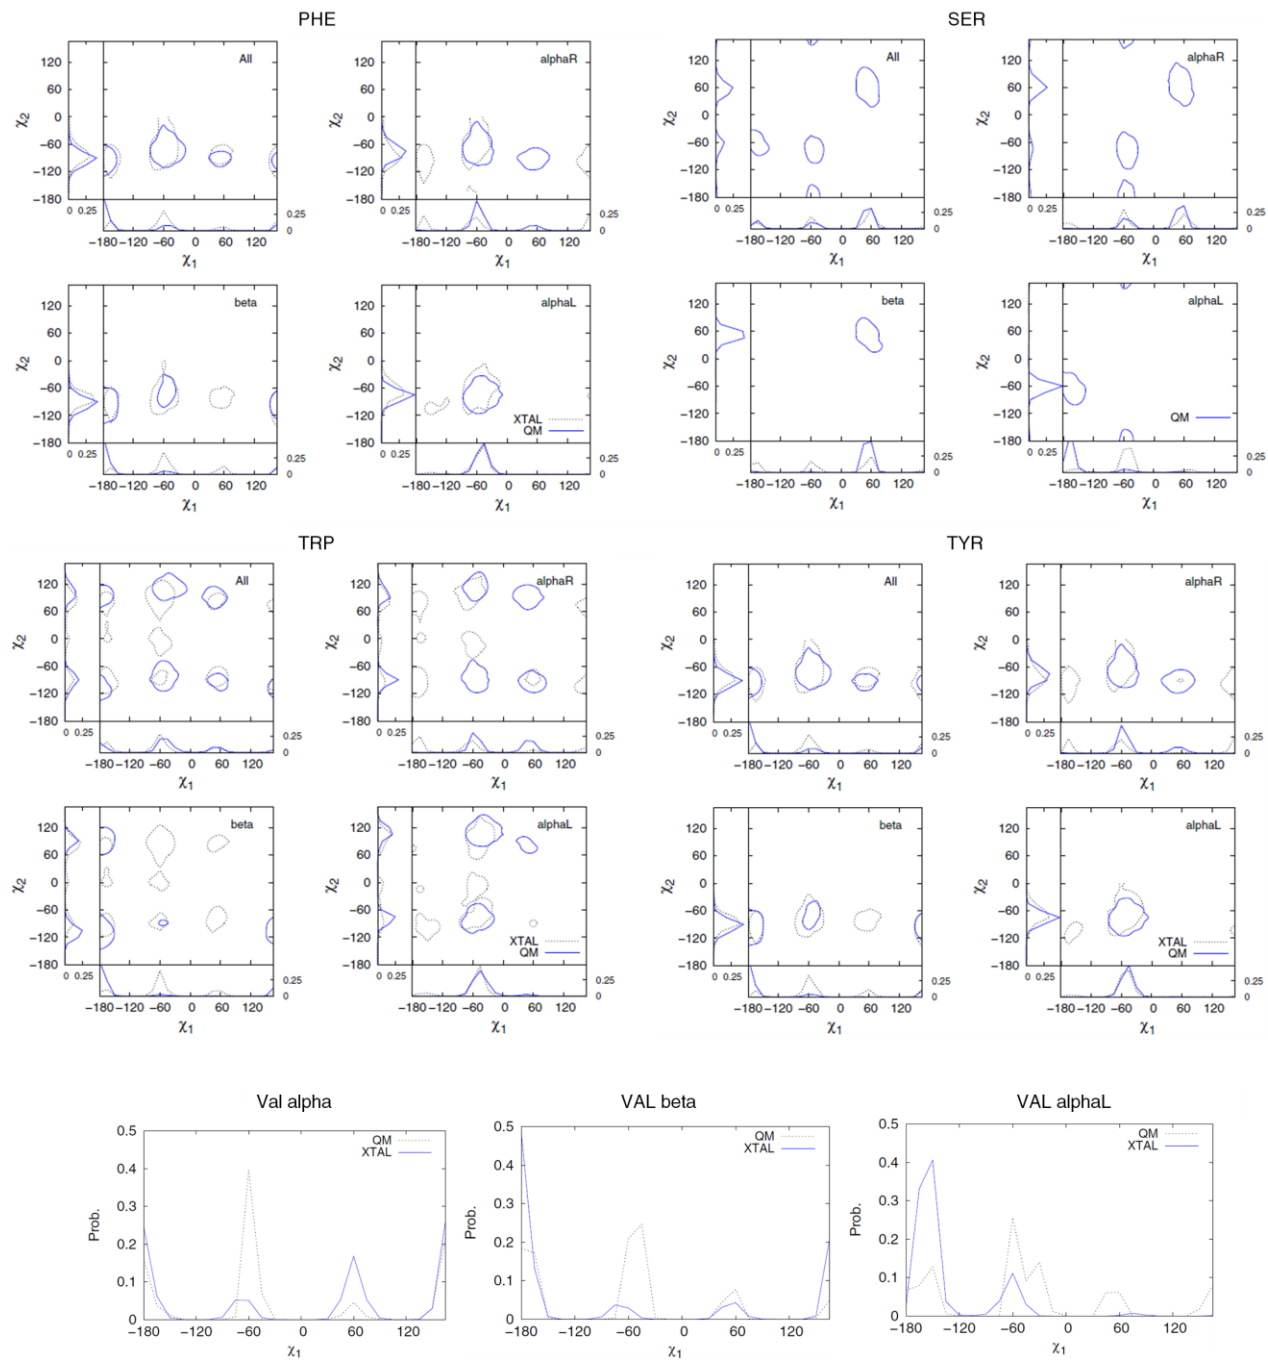

Figure S3 cont'd
